# Cellular crowd control: overriding endogenous cell coordination makes cell migration more susceptible to external programming

Gawoon Shim<sup>a</sup>, Danelle Devenport<sup>b</sup>, Daniel J. Cohen<sup>\*a</sup>

<sup>a</sup> *Department of Mechanical & Aerospace Engineering and* <sup>b</sup> *Department of Molecular Biology, Princeton University, Princeton, NJ, United States of America*

\* Corresponding author: [danielcohen@princeton.edu](mailto:danielcohen@princeton.edu)

## Abstract

As collective cell migration is essential in biological processes spanning development, healing, and cancer progression, methods to externally program cell migration are of great value. However, problems can arise if the external commands compete with strong, pre-existing collective behaviors in the tissue or system. We investigate this problem by applying a potent external migratory cue—electrical stimulation and electrotaxis—to primary mouse skin monolayers where we can tune cell-cell adhesion strength to modulate endogenous collectivity. Monolayers with high cell-cell adhesion showed strong natural coordination and resisted electrotactic control, with this conflict actively damaging the leading edge of the tissue. However, reducing pre-existing coordination in the tissue by specifically inhibiting E-cadherin-dependent cell-cell adhesion, either by disrupting the formation of cell-cell junctions with E-cadherin specific antibodies or rapidly dismantling E-cadherin junctions with calcium chelators, significantly improved controllability. Finally, we applied this paradigm of weakening existing coordination to improve control to demonstrate accelerated wound closure *in vitro*. These results are in keeping with those from diverse, non-cellular systems, and confirm that endogenous collectivity should be considered as a key, quantitative design variable when optimizing external control of collective migration.

## Introduction

Collective cell migration enables intricate, coordinated processes that are essential to multicellular life, spanning embryonic development, self-healing upon injury, and cancer invasion modes<sup>1</sup>. Control of collective cell migration, therefore, would be a powerful tool for biology and bioengineering as such control would enable fundamentally new ways of regulating these key processes, such as enabling accelerated wound healing. Efficient and precise control over cell motility is becoming increasingly feasible with modern biotechnologies. Tunable chemical gradient generators can redirect chemotaxing cells<sup>2,3</sup>, optogenetics can allow dynamic control of cell contractility<sup>4</sup>, micropatterned scaffolds can constrain and direct collective growth<sup>5</sup>, and recent work in bioelectric interfaces has even demonstrated truly programmable control over directed cell migration in 2D<sup>6,7</sup>. However, despite advances in sophisticated tools, applying them to complex, cellular collectives raises a fundamental problem: what happens when we command a tissue to perform a collective behavior that competes with its natural collective behaviors?

Paradoxically, those endogenous collective cell behaviors already present in tissues are both a boon and bane for attempts to control and program cell behavior. On the one hand, endogenous collective cell migration means the cells already have established mechanisms for coordinated, directional migration that external cues and control can leverage. For instance, cadherin mediated cell-cell adhesions in tissues mechanically couple cells together and allow for long-range force transmission and coordinated motion. This coupling allows tissues to migrate collectively and directionally over large distances and maintain cohesion and organization far better than individual cells might<sup>8,9</sup>. On the other hand, imposing a new behavior over an existing collective behavior may generate conflicts. Tight cell coupling can create a

48 ‘jammed state’ or homeostatic tissue where cells are so strongly attached and confined that they  
49 physically lack the fluidity to migrate as a group<sup>10,11</sup>. Strong coordination established via physical  
50 coupling can hinder cells from responding to signals for migration, as shown by the need for zebrafish  
51 and other embryos to weaken cell-cell junctions prior to gastrulation to ensure cells collectively migrate  
52 to necessary locations<sup>12-14</sup>. Hence, how ‘susceptible’ a collective system may be to external control likely  
53 depends on a tug-of-war between the resilience and strength of the natural collective processes and the  
54 potency of the applied stimulus.

55  
56 Here, we specifically investigate the relationship and interplay between an applied, external  
57 command attempting to direct collective cell migration, and the strength of the underlying collective  
58 behaviors already present in the tissue. We address two key questions: 1) how much does the strength of  
59 an endogenous collective migration behavior in a tissue limit our ability to control its collective cell  
60 migration, and 2) how can we circumvent such limitations? To investigate these questions, we needed  
61 both a programmable perturbation capable of controlling collective migration, and a physiologically  
62 relevant model system allowing for tunable ‘collectivity’. As a perturbation, we used the SCHEEPDOG  
63 bioreactor<sup>6</sup> to harness a bioelectric phenomenon called ‘electrotaxis’—directed cell migration in DC  
64 electric fields—which can broadly induce large-scale directional migration *in vitro* in over 20 cell types  
65 and is implicated in a number of developmental processes as a navigational cue guiding cell migration *in*  
66 *vivo*<sup>15-17</sup>. Briefly, electrotaxis arises when endogenous, ionic fields form during healing or development  
67 (~1 V/cm) and apply gentle electrophoretic or electrokinetic forces to charged receptors in cell  
68 membranes, causing them to aggregate towards one side of a cell and produce a front-rear polarity  
69 cue<sup>18,19</sup>. Electrotaxis is perhaps the only cue that can guide large-scale migration in a broad range of cell  
70 and tissue types without any modifications, and this generality and prior demonstrations of collective  
71 electrotaxis<sup>6,8,20</sup> made it a strong candidate.

72  
73 To complement electrotaxis, we chose primary mouse skin for our model system as skin injuries  
74 were where the endogenous electrochemical fields that cause electrotaxis were first discovered (center of  
75 a wound is negative relative to the periphery), and we and others have shown layers of keratinocytes to  
76 exhibit strong electrotaxis<sup>6,21-23</sup>. Critically, primary mouse keratinocytes have tunable ‘collectivity’ in  
77 culture. Specifically, cell-cell adhesion strength in this system, mediated by cadherin proteins, can be  
78 easily tuned by varying calcium levels in the media—with low calcium media thought to mimic  
79 conditions in the basal layers of the epidermis with weak adhesions, and high calcium media akin to  
80 conditions in the uppermost layers of skin with strong adhesions<sup>24-27</sup>.

81  
82 Together, these experimental approaches allowed us to precisely explore how the ability to  
83 externally ‘steer’ collective migration in a living tissue using a powerful bioelectric cue depends on the  
84 native collectivity of the underlying tissue. First, we quantify and validate that we can tune collective  
85 strength in cultured skin layers, and link collectivity to E-cadherin and collective migration phenotypes.  
86 Next, we demonstrate how applying the same electrical stimulation conditions to tissues with differing  
87 native collectivity results in radically different outputs with weakly collective tissues precisely responding  
88 to our attempts to control their motion, while strongly collective tissues exhibited detrimental  
89 supracellular responses resulting in tissue collapse. We then prove that E-cadherin is responsible for these  
90 differences, ruling out any effects of calcium signaling per se. Finally, we leverage these findings to  
91 develop a new approach that allows us to effectively control mature, strongly collective tissues, which we  
92 utilize to demonstrate that we can accelerate wound repair *in vitro*.

## 93 94 **Results**

### 95 96 **Establishing baseline collective migration of primary keratinocyte layers**

97

98 To determine how natural collective cell behaviors compete with externally imposed control of collective  
 99 behavior, we first need to establish baseline data of endogenous collective behavior in the absence of  
 100 guidance cues. We used layers of mouse primary keratinocytes as a model system as their endogenous  
 101 collective behavior is well-characterized<sup>22,28</sup>, they have a strong electrotactic response<sup>6</sup>, and their cell-cell  
 102 adhesion levels can be easily tuned via calcium levels in the culture media<sup>27,29</sup>. Previous work has  
 103 indicated that cell-cell adhesions via calcium-dependent proteins, E-cadherin adhesion being one of the  
 104 best-studied, are essential in interconnecting individual cells and maintaining coordination within the  
 105 monolayers by coupling mechanical information via the cadherin-catenin-actin complex<sup>30-33</sup>. Hence, we  
 106 hypothesized that modulation of cell-cell adhesion levels via calcium control would allow us to tune the  
 107 relative strength of collective couplings and collective migration in primary keratinocyte layers, giving us  
 108 a precise and reproducible system to explore questions of collective control.  
 109

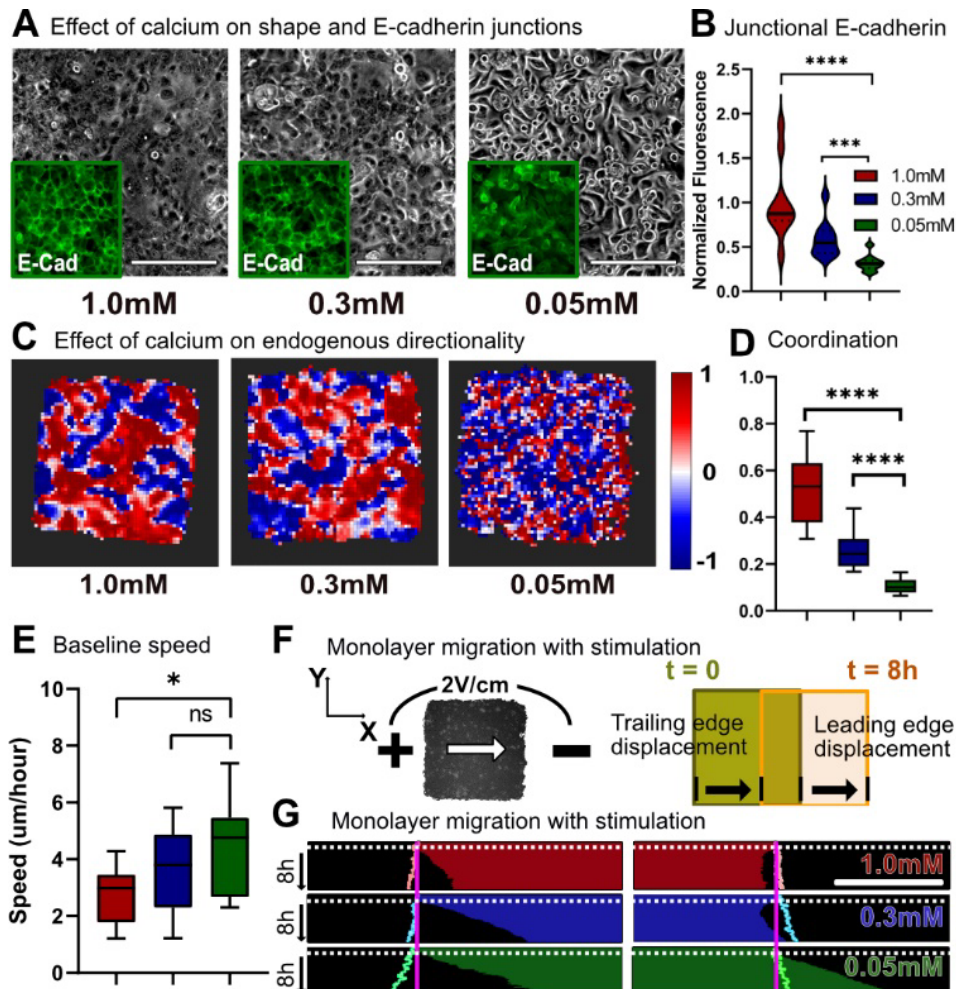

110  
 111 **Figure 1. Baseline collective behavior of keratinocyte monolayers; endogenous coordination increases with**  
 112 **calcium-dependent cell-cell adhesion.** A) Phase and E-cadherin imaging for primary mouse keratinocyte  
 113 monolayers cultured in high (1.0mM), medium (0.3mM), and low (0.05mM) calcium media for 14h. Grey: phase  
 114 image; green inset: immunofluorescence image of E-cadherin. Scale bar = 200um. B) Distribution plot for the  
 115 normalized junctional E-cadherin immunofluorescence signal for high, medium, and low calcium monolayers. C)  
 116 Horizontal directionality heatmap for monolayers of varying calcium. D) Distribution plot for coordination values  
 117 for monolayers of varying calcium. Legends identical to B). E) Baseline migration speed for monolayers of varying  
 118 calcium. F) Schematic for keratinocyte monolayer migration towards the cathode; leading and trailing edge  
 119 displacement. G) Leading and trailing edge displacement kymographs for monolayers of varying calcium  
 120 throughout 1h control (no stimulation) and 8h stimulation. Electrical stimulation starts at white dotted line. Pastel  
 121 outlines indicate the edge displacement of unstimulated monolayers at same calcium level throughout 9h. Scale bar

122 = 500um. P values are calculated using unpaired nonparametric Mann-Whitney test with n = 15 for each condition.  
123 \*\* corresponds to  $p < 0.001$ , and \*\*\*\* to  $p < 0.0001$ .

124  
125 To establish quantitative standards for collective strength in our keratinocyte model, we  
126 engineered arrays of identical 2 x 2 mm keratinocyte tissues using tissue stenciling methods<sup>6,34</sup>. Tissue  
127 arrays were then cultured for 14 h in high (1.0 mM), medium (0.3 mM), or low (0.05 mM) calcium  
128 conditions to allow junction formation (Fig. 1A). These calcium levels are standard conditions that span  
129 the physiological range based on phenotypes and marker expressions<sup>27,29,35,36</sup>. As E-cadherin is a major  
130 calcium-dependent adhesion protein, we used immunostaining to quantify and confirm the direct  
131 relationship between calcium level and E-cadherin recruitment to cell-cell junctions (Figs. 1A, 1B, S1).  
132 We generated collective migration data for each tissue by processing phase-contrast timelapse movies  
133 captured using automated imaging (Methods) with Particle Image Velocimetry (PIV) to generate velocity  
134 vector fields at each time point. The vector fields were then analyzed to visualize and quantify the  
135 strength of coordinated motion within a given tissue over time (Fig. S2)<sup>6,21,34</sup>. First, we calculated the  
136 directionality of cellular movements to visualize domains of coordinated migration within tissues.  
137 Directionality (Eqn. 1) is defined as the average of the cosine of  $\theta$ , the angle between each PIV velocity  
138 vector and the horizontal x-axis, while N is equal to the total number of velocity vectors in the frame. As  
139 the electric field command is also in the horizontal direction, the directionality also indicates how well  
140 aligned the cellular migration is with the field direction under stimulation. Directionality can vary  
141 between -1 (cell motion to the 'left'; perfectly anti-parallel with field) and 1 (cell motion to the right;  
142 perfectly parallel with field). Additionally, we quantified the collectivity by calculating the overall  
143 coordination within a tissue using the polarization order parameter (Eqn. 2) from collective theory, where  
144  $v_i$  indicates the  $i$ th velocity vector<sup>37</sup>. A coordination value of 1 indicates perfect coordination and  
145 anisotropy across the whole tissue, while 0 indicates wholly isotropic motion.

$$\text{Directionality} = \frac{1}{N} \sum_{i=1}^N \cos \theta \quad (\text{Equation 1})$$

$$\text{Coordination} = \left\| \frac{1}{N} \sum_{i=1}^N \frac{\vec{v}_i}{\|v_i\|} \right\| \quad (\text{Equation 2})$$

146  
147 Our data (Figs. 1C, 1D) clearly demonstrate that increasing calcium levels increases collectivity  
148 within the tissue. Both the general size of coordinated domains, represented by large zones of either red  
149 or blue in Fig. 1C, and the coordination parameter varied directly with calcium levels (Fig. 1D). The  
150 Velocity correlation function for nearest neighbors also show higher correlation with increased calcium  
151 levels (Fig. S8). However, we also noted that increased coordination came at the cost of reduced average  
152 cell migration speed (Fig. 1E, Movie S1), suggesting that strong cell-cell adhesion impeded cellular  
153 motion, a common tradeoff in collective motion<sup>38</sup>. Notably, there is a clear shift in cell and tissue  
154 morphology across the different calcium levels, with high calcium tissues visually exhibiting  
155 supracellular fluctuations and low calcium tissues behaving far more like a dense collection of  
156 individualistic agents. Together with our data indicating that E-cadherin levels also vary directly with  
157 calcium, and prior studies indicating a strong correlation between cadherin levels and coordination, these  
158 data validated our ability to tune endogenous collective strength in keratinocyte layers, and to quantify  
159 and profile the natural collective motion of unstimulated tissues. With baselines established, we next  
160 investigated how collective strength regulates electrotactic susceptibility.

161  
162 **Strong collectivity makes it more difficult to program collective cell migration**

163  
164 Having related low calcium levels to weak collectivity and low junctional E-cadherin, and high  
165 calcium levels to strong collectivity and high junctional E-cadherin, we next attempted to program and  
166 drive collective migration in these tissues using bioelectric stimulation. Here, we delivered a

167 unidirectional electrotactic cue using a modified version of our SCHEEPDOG electro-bioreactor  
 168 (Methods). Briefly, the SCHEEPDOG platform integrates a microfluidic bioreactor containing  
 169 programmable electrodes around pre-grown tissue arrays. Here, we applied an electric field of 2V/cm for  
 170 8h across keratinocyte monolayers patterned and cultured as described previously (Fig. 1F). While all  
 171 tissues responded strongly the applied field, the nature of the response heavily depended on the collective  
 172 strength of the tissue (Fig. 1G, Movie S2).

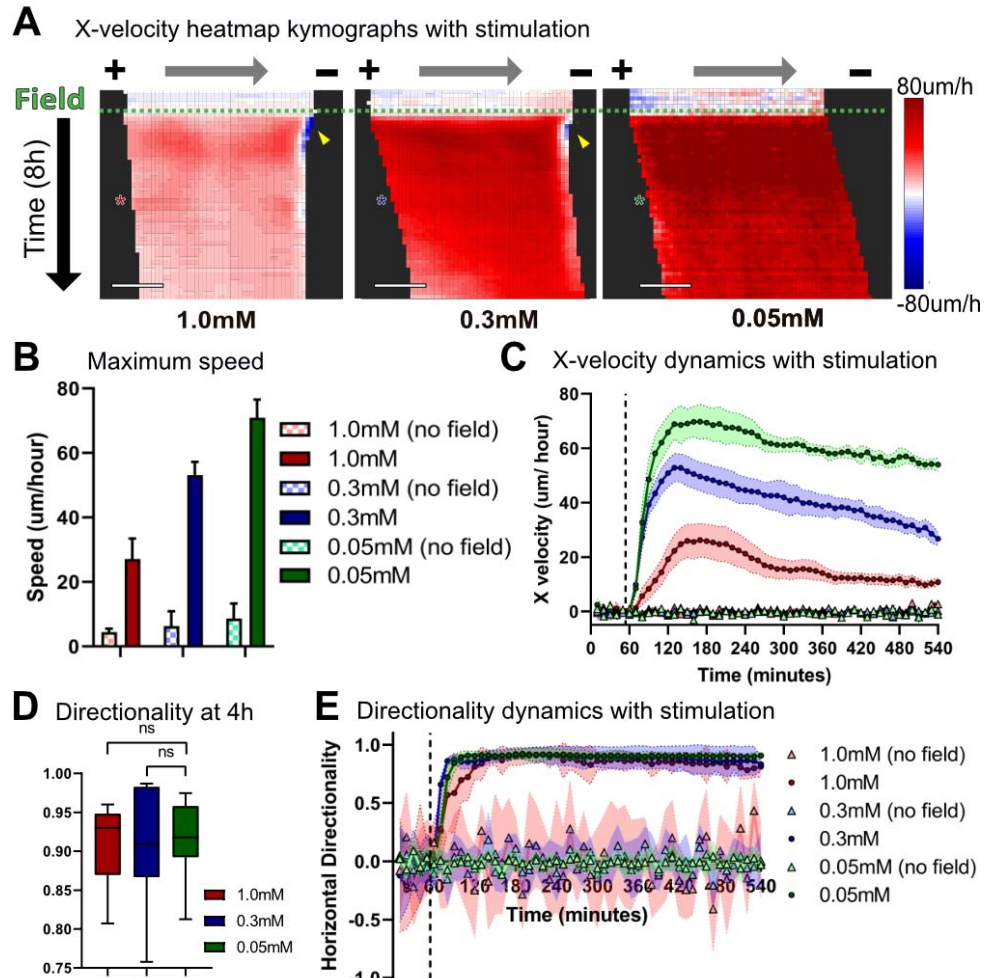

173 **Figure 2. Increased coordination reduces monolayers' responsivity to electrical stimulation.** A) X-velocity  
 174 heatmap kymograph for 1h control and 8h stimulation. Each square corresponds to 40-45um of the monolayer.  
 175 Electrical stimulation starts at the green dashed line. Asterisks indicate 4h into electrical stimulation. 10 min/ row.  
 176 Scale bar = 500um. B) Maximum migration speed for monolayers with and without electrical stimulation. C)  
 177 Averaged X-velocity of migrating monolayers throughout 1h control (no field) and 8h stimulation. Error bars  
 178 represent standard deviation across tissues. Dashed vertical lines denote when the field was switched on. Legends  
 179 identical to B). D) Horizontal directionality at 4h into stimulation. E) Horizontal directionality throughout 1h control  
 180 and 8h stimulation. Error bars represent standard deviation across tissues. Dashed vertical lines denote when the  
 181 field was switched on. P values are calculated using unpaired nonparametric Mann-Whitney test with n = 12-15 for  
 182 each condition.  
 183

184  
 185 Specifically, changes in collective strength impacted the spatiotemporal response of the tissue  
 186 with respect to migration speed and directedness (Fig. 2A). While cells in all tissues increased their  
 187 overall speed during electrotaxis as seen in previous work<sup>6,20,21,34,39,40</sup>, the relative increase in speed varied  
 188 inversely with collective strength, with weakly collective monolayers migrating at almost twice the speed  
 189 of strongly collective monolayers under the same electrical stimulation (Figs. 2B, 2C). Faster motion in

190 less strongly collective tissues was consistent with the baseline motility data without stimulation.  
 191 Although the overall directedness of collective migration during electrotaxis was independent of  
 192 collective strength, we noted that stronger collectives took longer to align than did weakly collective  
 193 tissues, with the most strongly collective tissues taking ~35 minutes longer to align than the other  
 194 conditions (Figs. 2D, 2E). This clearly demonstrates a competition between the endogenous collective  
 195 behavior of a tissue and the imposed command, making more strongly collective tissues less responsive to  
 196 bioelectric cues.  
 197

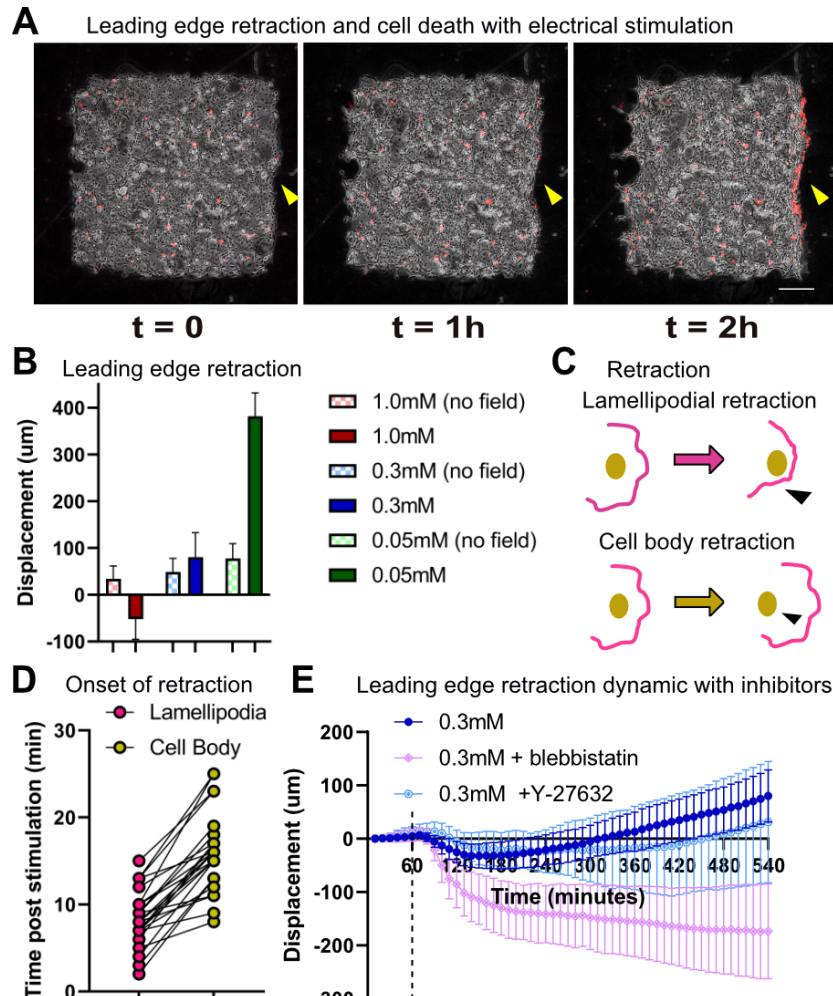

198  
 199 **Figure 3. Leading edge retraction and cellular damage with stimulation in highly coordinated monolayers.** A) Phase (grey) and EthD-1 dye (red) images throughout 2h electrical stimulation of medium calcium monolayer. Yellow arrows point to cell death and retraction at leading edge. Scale bar = 500um. B) Leading edge displacement after 9h for monolayers with and without electrical stimulation. Error bars represent standard deviation across tissues. C) Schematic of lamellipodial retraction vs. cell body retraction with electrical stimulation. D) Onset time of lamellipodial retraction and cell body retraction post electric stimulation (n = 24). E) Leading edge displacement plot for medium calcium monolayers treated with blebbistatin (light pink) and Y-27632 (light blue) and electrically stimulated. Error bars represent standard deviation across tissues (n = 10). Dashed vertical lines denote when the field was switched on.

208  
 209 **Naive collective control can result in catastrophic damage to the tissue**

210  
 211 Beyond differences in speed and response time, we observed a far more striking and detrimental  
 212 phenotype: both our moderately and strongly collective tissues experienced powerful retraction and

213 collapse of their leading edges, with the effect being more pronounced in strongly collective tissues (Figs.  
214 1G, 2A, 3A). Quantifying the dynamics of retraction revealed retraction occurred within 15 minutes of  
215 electrical stimulation (Figs. 2A, S3) in the moderate and strong collectives, while weakly collective  
216 tissues advanced with no apparent problems. Retraction also caused high cytotoxicity, and a marker for  
217 membrane damage (ethidium homodimer, Methods) revealed strong and localized damage all along the  
218 retracting edge (Figs. 3A, S4; Movie S3). We quantified the overall effect of retraction by analyzing total  
219 leading edge displacement over 8 h of stimulation (Fig. 3B), where we see that strongly collective tissues  
220 experienced net negative forward motion, moderately collective tissues recovered some forward motion,  
221 and weakly collective tissues advanced nearly 4X over their unstimulated control case.

222  
223 To better understand retraction, we analyzed higher frame-rate videos of the process and found  
224 that, in all cases, lamellipodial detachment preceded both cell blebbing and eventual retraction of the cell  
225 body (Figs. 3C, 3D; Movie S3). Such retraction is strikingly reminiscent of tissue dewetting, a  
226 phenomenon in which cellular monolayers detach from the substrate and retract inwards as E-cadherin  
227 junctions trigger myosin phosphorylation, increasing cortical tension within the monolayer<sup>41,42</sup>. That we  
228 do not observe retraction in single cells at any calcium level is also consistent with dewetting (Movie S4).  
229 As dewetting could be delayed by reducing contractility<sup>41</sup>, we hypothesized that disrupting contractility in  
230 monolayers would also mitigate leading edge retraction. We used inhibitors to disrupt contractility in  
231 electrotaxing cell collectives, by treating monolayers with either blebbistatin or Y-27632 at 20uM for 1h  
232 before electrical stimulation<sup>39,43</sup> and maintaining inhibitor levels during perfusion. However, both  
233 inhibitors failed to mitigate retraction—while Y-27632 had little effect, blebbistatin significantly  
234 worsened the phenotype (Fig. 3E, Movie S5). This suggests that simple contractility is unlikely to be the  
235 dominant driving force in leading edge retraction.

236

### 237 **Cell-cell adhesion is uniquely responsible for bioelectric collective migration control**

238

239 Based on our data showing a correlation between collective strength and junctional E-cadherin,  
240 we hypothesized that E-cadherin-mediated cell-cell adhesion was a likely regulator of electrotactic  
241 control. To validate this and to rule out effects from calcium signaling<sup>44-46</sup>, we treated tissues with a  
242 known blocking antibody against extracellular E-cadherin (DECMA-1) that specifically targeted and  
243 weakened cell-cell adhesion without altering calcium (Fig. 4A)<sup>47</sup>. Addition of the E-cadherin blocking  
244 antibody potentially increased unstimulated migration speed within the monolayers at all calcium levels,  
245 and significantly reduced overall migration coordination even in the moderate and high calcium samples  
246 (Figs. 4B, 4C).

247 Having downregulated collective strength of tissues at all three calcium levels, we then tested  
248 how they responded to electrical stimulation. DECMA-1 treatment ‘rescued’ forward motion by  
249 alleviating retraction in all calcium conditions (Fig. 4D-F, Movie S6). Notably, all tissues experienced  
250 improvements to both forward motion (Fig. 4F) and average speed (Fig. 4G). That DECMA treatment  
251 improved performance in even low calcium tissues was notable as it implied that even the weak cell-cell  
252 adhesion still present in those tissues constrained the electrotactic response. Interestingly, while the  
253 overall speed and displacement of tissues were improved by blocking cell-cell adhesion, the accuracy, or  
254 directionality of the collective migration response was more nuanced (Fig. 4H). DECMA-1 significantly  
255 increased the directionality in strongly collective monolayers while reducing directionality in weakly  
256 collective monolayers. To better relate this to accuracy or ‘spread’, we plotted polar histograms of the  
257 angles between cell velocity vectors and the electric field vector (Fig. 4I). Specifically, DECMA-1  
258 decreased scattering of electrotactic collective migration in strongly collective monolayers, while treating  
259 weakly collective monolayers with DECMA-1 increased scattering in the direction perpendicular to the  
260 electrical field making the control less precise (Fig. 4I, right). These data both suggested that overly  
261 strong native coordination, mediated specifically by E-cadherin here, can reduce controllability or cause  
262 adverse effects such as retraction.

263

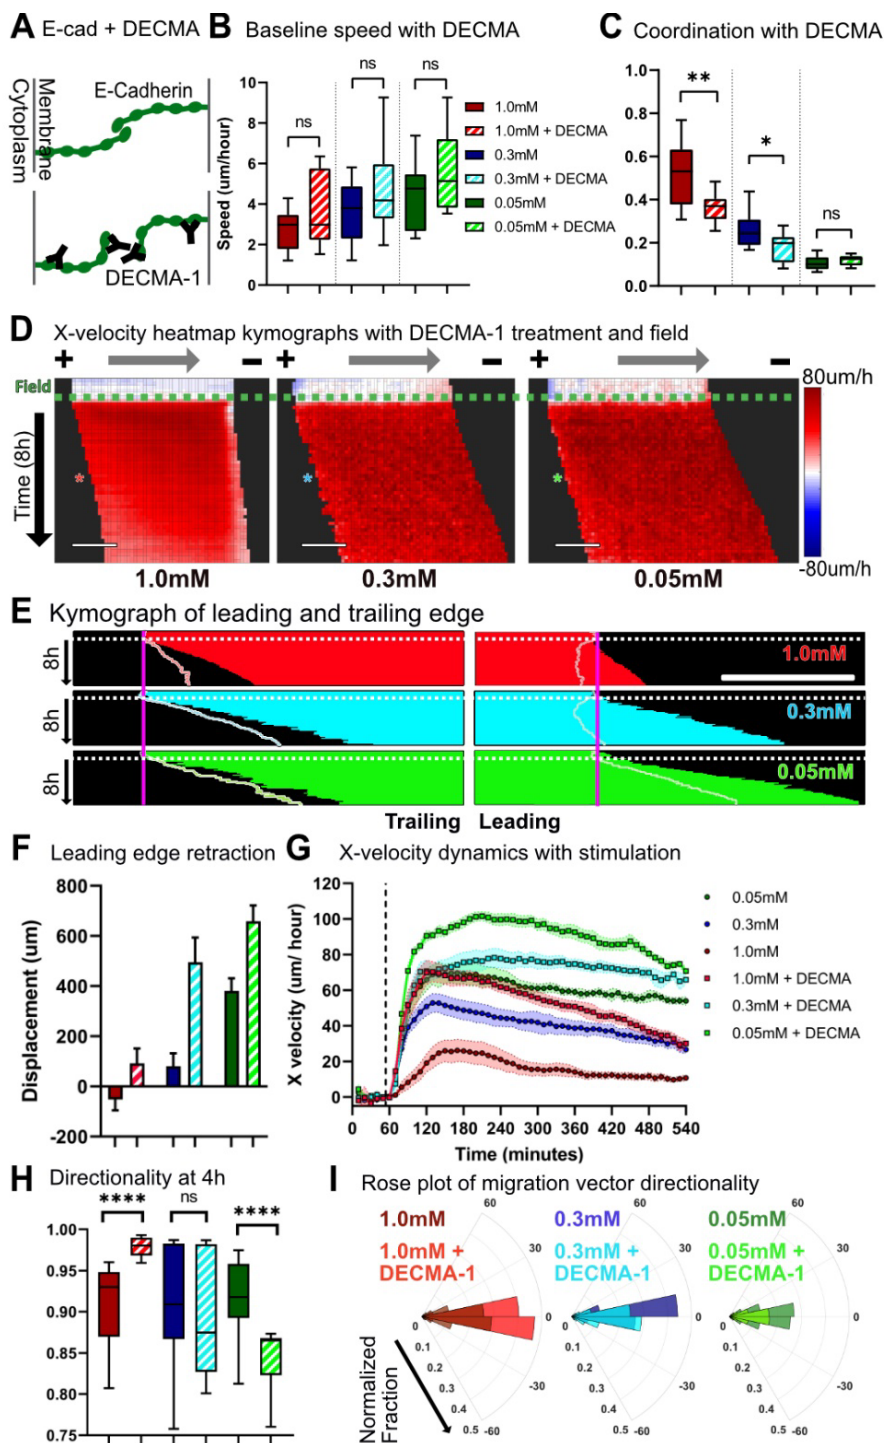

264  
 265 **Figure 4. Disrupting E-cadherin junction formation with DECMA-1 reduces coordination and**  
 266 **controllability.** A) Schematic of normal E-cadherin junction formation vs. with DECMA-1 disruption. B) Baseline  
 267 migration speed for monolayers cultured in varying calcium, with and without DECMA-1. C) Coordination values  
 268 for monolayers cultured in varying calcium, with and without DECMA-1. Legends identical to B). D) X-velocity  
 269 heatmap kymograph for monolayers pretreated with DECMA-1 throughout 1h control and 8h stimulation. Each  
 270 square corresponds to 40-45µm of the monolayer. Electrical stimulation starts at the green dashed line. Asterisks  
 271 indicate 4h into electrical stimulation. 10 min/ row. Scale bar = 500µm. E) Kymographs of monolayers pretreated  
 272 with DECMA-1 throughout 1h control and 8h stimulation. Electrical stimulation starts at white dotted line. Pastel  
 273 outlines indicate the edge of stimulated monolayers without DECMA-1 at same calcium level. Scale bar = 500µm.



274 F) Leading edge displacement after 1h control and 8h stimulation for monolayers with and without DECMA-1 at  
 275 varying calcium. Legends identical to B). G) X-velocity throughout 1h control and 8h stimulation for monolayers  
 276 with and without DECMA-1. Error bars represent standard deviation across tissues. Dashed vertical lines denote  
 277 when the field was switched on. H) Horizontal directionality at 4h into stimulation for monolayers with and without  
 278 DECMA-1 with varying calcium. I) Polar distribution plot of the velocity vector angle with respect to direction of  
 279 electrical field. Legends identical to B). P values are calculated using unpaired nonparametric Mann-Whitney test  
 280 with  $n = 12-15$  for each condition. \* corresponds to  $p < 0.05$ , \*\* to  $p < 0.01$ , and \*\*\*\* to  $p < 0.0001$ .

281

## 282 Disassembly, collective transport, and reassembly of a tissue as a control strategy

283

284 Knowing both that strong cell-cell adhesion can limit electrostatic control in skin, and yet E-  
 285 cadherin is essential for skin function and barrier formation, we sought to develop a more general  
 286 stimulation strategy to allow us to transiently disrupt cell-cell junctions, use electrotaxis to reshape or  
 287 move the more susceptible tissue, and then reassemble junctions when the tissue had reached its target  
 288 location. While DECMA-1 treatment was effective at revealing the role of E-cadherin, it has three  
 289 significant limitations as a general approach: (1) antibodies are expensive; (2) it is difficult to control how  
 290 long it will block junctions; and (3) antibodies appear to have a difficult time penetrating very strong cell-  
 291 cell junctions (Figs. 4D-F, Fig. S5), thereby limiting their overall value in the very tissues we are trying to  
 292 control more effectively. As an alternative, we tested brief exposure to BAPTA, an extracellular calcium-  
 293 specific chelator (Methods), and examined how it disrupted E-cadherin junctions in pre-established  
 294 tissues<sup>48</sup>. Fluorescence imaging of GFP E-cadherin keratinocytes confirmed that 1h of BAPTA treatment  
 295 applied to tissues with strong E-cadherin junctions could transiently reduce junctional E-cadherin and  
 296 reduce coordination (Fig. 5A, B).

297

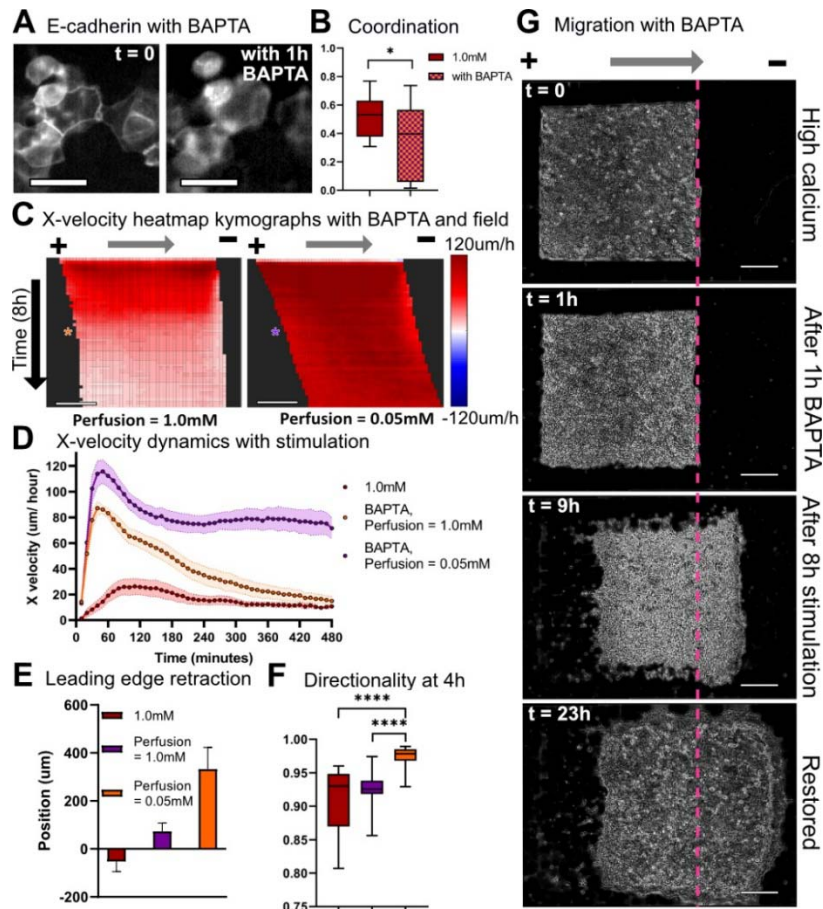

298

299 **Figure 5. Controllability of highly coordinated monolayers can easily and quickly rescued by acutely altering**  
 300 **E-cadherin junctions.** A) GFP E-cadherin keratinocyte fluorescence images at  $t = 0$  (left) and with 1h BAPTA  
 301 treatment (right). Scale bar = 20 $\mu$ m. B) Coordination values for high calcium monolayers and high calcium  
 302 monolayers treated for 1h with 20 $\mu$ M BAPTA. C) X-velocity heatmap kymograph for BAPTA-treated high calcium  
 303 monolayers stimulated in high and low calcium media. Asterisks indicate 4h into electrical stimulation. 10 min/ row.  
 304 Scale bar = 500 $\mu$ m. D) X-velocity throughout 8h stimulation for high calcium monolayers and high calcium  
 305 monolayers treated with BAPTA and stimulated in high or low calcium media. Error bars represent standard  
 306 deviation across tissues. E) Leading edge displacement of BAPTA treated high calcium monolayers after 8h  
 307 stimulation in high and low calcium media. Error bars represent standard deviation across tissues. F) Horizontal  
 308 directionality at 4h into stimulation. G) Phase image of high calcium keratinocyte monolayers at  $t = 0$ , treated 1h  
 309 with BAPTA, electrically stimulated in low calcium media for 8h, and restored in high calcium media for 14h.  
 310 Image at  $t = 0$ ,  $t = 1$ h after 1h BAPTA treatment,  $t = 9$ h after 8h stimulation in low calcium media, and  $t = 17$ h after  
 311 14h restoration in high calcium media. Scale bar = 500 $\mu$ m. P values are calculated using unpaired nonparametric  
 312 Mann-Whitney test with  $n = 12-15$  for each condition. \* corresponds to  $p < 0.05$ , and \*\*\*\* to  $p < 0.0001$ .

313  
 314 To test how rapid chelation affected the controllability of strongly collective monolayers, we  
 315 treated monolayers with BAPTA for 1h, washed out the chelator, and returned the monolayers to  
 316 BAPTA-free, high calcium media for electrical stimulation. 1h of BAPTA treatment boosted  
 317 controllability in strongly collective monolayers, with treated monolayers exhibiting both significantly  
 318 increased migration speed and reduced leading edge retraction (Fig. 5B). However, these benefits were  
 319 short-lived and speed and displacement drastically decreased over time (Figs. 5C-E, ‘orange’) likely as  
 320 cell-cell junctions eventually re-engaged due to the high calcium concentration (Fig. S6). To prevent the  
 321 gradual restoration of junctions, we maintained tissues in low calcium media after washing out BAPTA.  
 322 These tuned tissues and exhibited a nearly 5X increase in maximum speed, strong leading edge  
 323 displacement, and high alignment with the field command (Figs. 5B-E, ‘purple’).

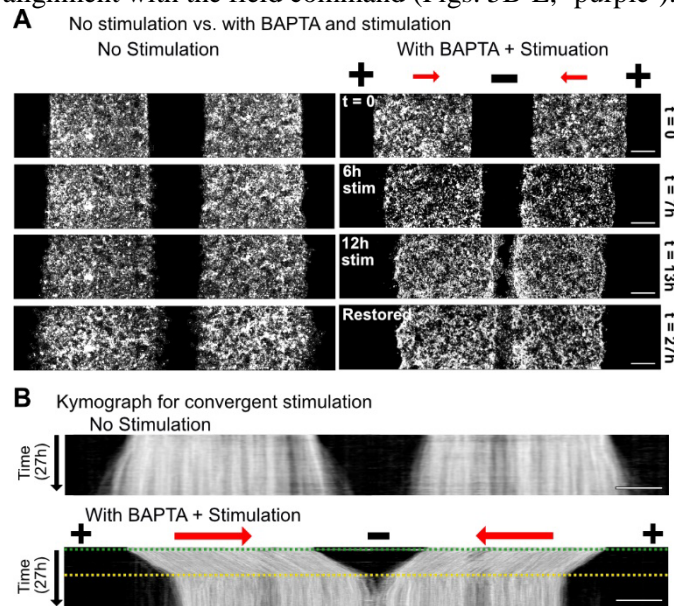

324 **Figure 6. Accelerated wound healing using electrical stimulation and manipulation of cell-cell adhesion**  
 325 **strengths.** A) Wound closure: fluorescence images for unstimulated high calcium monolayers (left) and high  
 326 calcium monolayer treated with BAPTA, convergently stimulated in low calcium media for 12h, and incubated in  
 327 high calcium media for 14h (right). Scale bar = 500 $\mu$ m. B) Kymograph of unstimulated high calcium monolayer  
 328 (top) and high calcium monolayer treated with BAPTA, convergently stimulated in low calcium media for 12h, and  
 329 incubated in high calcium media for 14h (bottom). Green dashed line indicates when the stimulation was switched  
 330 on and media was changed to low calcium media, and yellow dashed line indicates when the stimulation was  
 331 switched off and monolayers were returned to high calcium media. Scale bar = 500 $\mu$ m.

332  
 333

334 Having confirmed that transient chelation could dramatically increase controllability, we then  
335 examined if we could restore the monolayer to its initial, highly coordinated state by removing the  
336 electrical field and returning disrupted monolayers to high calcium media, allowing the calcium to  
337 reestablish junctions. E-cadherin fluorescence imaging shows that disrupted monolayers returned to high  
338 calcium media overnight regained their contact with neighbors and reestablished strong E-cadherin  
339 junctions (Fig. S7). Timelapse imaging of the entire process—BAPTA treatment of strongly collective  
340 monolayers, migration in low calcium media, and restoration in high calcium media—demonstrates how a  
341 difficult to control tissue can be transformed to a more susceptible tissue, maneuvered to a desired  
342 location an arbitrary distance away, and then reassembled (Figure 5I, Movie S8). In this case, while we do  
343 still note a thin zone of membrane damage at the initial leading edge (Movie S8, red band at the rightward  
344 edge), this no longer causes retraction and the tissue instead surges forward as a cohesive unit.

### 346 **Accelerating bioelectric healing *in vitro* by manipulating the strength of cell-cell adhesion**

347  
348 Combining pharmacological perturbations with bioelectric cues to improve tissue response  
349 suggests practical avenues to engineering the behavior of otherwise recalcitrant tissues for practical  
350 purposes. To demonstrate this, we attempted to electrically accelerate *in vitro* wound healing of a strongly  
351 collective skin layer. In this case, naïve stimulation would trigger a collapse or at best no edge outgrowth  
352 (Figs. 2-3), but the disassembly/reassembly process described above should enable complete, expedited  
353 healing. To test this, we created a wound gap across a strongly collective, high-calcium skin layer and  
354 then reconfigured the electrodes in SCHEEPDOG to generate an electric field that converged on the  
355 middle of the wound to drive each side of the tissue inwards<sup>49</sup> (Methods). Identical to the scheme  
356 described above, strongly collective monolayers were treated with BAPTA for 1h, stimulated in low  
357 calcium media for 12h, and restored in high calcium media. The increase of wound closure rate for  
358 BAPTA + electrically stimulated tissues compared non-stimulated strongly collective monolayers is  
359 clearly visible in the timelapse panels (Fig. 6, Movie S9). Monolayers moved towards each other rapidly  
360 during the 12h stimulation and successfully merged soon after they were returned to high calcium media  
361 to restore their initial state. These data demonstrate both how controllability of tissues can be dynamically  
362 tuned, and how such tuning can be used to practical effect—in this case, increasing the baseline wound  
363 closure rate by ~2.5X.

### 366 **Discussion: “If you can’t join it, then beat it.”**

367 Our work demonstrates that the more strongly collective a given tissue is—determined here by  
368 cell-cell adhesion and native coordination levels—the more difficult it may be to externally program the  
369 behavior of that tissue as the command and the native behaviors compete with each other. A corollary to  
370 this is that, rather than synergizing with an existing collective behavior it can be beneficial to weaken,  
371 override, or ‘beat it’. In particular, our results demonstrate that we can better optimize the ‘controllability’  
372 of a cellular collective by both applying an appropriate external stimulus, and also modifying the internal,  
373 collective imperatives of the target system to mitigate the chance of conflict between imperatives.

374  
375 Surprisingly, the consequences of ignoring the potential conflict between the command and  
376 natural imperative of a tissue can be quite drastic. While programmed electrotaxis of layers of weakly  
377 coupled primary mouse skin cells allowed for clean, large scale control over tissue migration, the same  
378 electrical stimulation applied to strongly collective skin layers resulted in not only collapse of the leading  
379 edge of the tissue, but also considerable membrane damage in those cells at the leading edge (Figs. 2,3).  
380 Some level of supracellular differences in behavior across an electrotaxing tissue—where the edges of a  
381 tissue seem less responsive than the bulk—have been noted in several prior electrotaxis studies in  
382 different models<sup>6,21,34</sup>, but the collapse we see here has not been previously reported. Further, that  
383 inhibiting cell contractility (Fig. 3) worsened the problem here suggests that collective contractility is not  
384 to blame for sub-optimal electrotaxis and is consistent with prior data indicating that inhibiting myosin-

385 mediated contractility does not abolish collective electrotaxis<sup>39</sup>. Further work on actual cytoskeletal  
386 morphology and behavior at the leading edge of driven, collectively migrating tissues seem necessary to  
387 better clarify the role of the cytoskeleton in the collapse we observe.  
388

389 However, we were able to completely mitigate edge collapse and restore sustained directed  
390 motion across a whole tissue by specifically targeting E-cadherin to weaken cell-cell adhesion strength.  
391 Cell-cell adhesion, often regulated by E-cadherin, plays a critical role in collective cell migration as cell-  
392 cell junctions allow intimate coupling of physical forces and mechanical signaling across cells, which can  
393 enable long-range coordination and the emergence of collective motion<sup>50,51</sup>. Our data linking reduced E-  
394 cadherin levels to weaker baseline coordination (Figs. 1B-D, 4C), and the results of specific inhibition of  
395 E-cadherin junctions (Fig. 4D-I) support the concept that targeting E-cadherin tipped the balance in favor  
396 of electrotaxis, allowing the electrical cue to outcompete the now weaker internal collective prerogatives  
397 of the tissue. When the results are considered alongside prior findings where E-cadherin knock-down  
398 diminished electrotaxis in immortalized epithelial cells<sup>8,52</sup>, despite the complications in direct comparison  
399 due to differences in the cell type and baseline collective behaviors, the emerging story shows that while  
400 E-cadherin appears to be play a major role in regulating collective electrotaxis, either too little or too  
401 much cell-cell adhesion can detrimentally affect controllability. Hence, there appears to be a ‘goldilocks’  
402 window for cell-cell adhesion strength and effective electrotactic control, and native cell coordination  
403 should be treated as an independent variable to be modified as needed to optimize controllability, such as  
404 with electrotaxis.  
405

406 This ability to independently tune internal collective strength and externally electrically stimulate  
407 a tissue suggested a solution to the problem of controlling strongly collective tissues: (1) transiently  
408 weaken internal collective coupling in a tissue; (2) bioelectrically drive the more controllable tissue to a  
409 target location or configuration; and (3) fully restore cell-cell coupling and tissue integrity at the new  
410 location. This approach ultimately allowed us to accelerate the collective healing process of a strongly  
411 collective, injured skin layer such that it healed at least twice as quickly as the control. Unexpectedly, we  
412 noted that electrotactic performance during this process of dynamically adjusting collective strength was  
413 improved, in terms of both speed and directionality, compared to tissues that began as weak collectives  
414 (Fig. 2 versus Fig. 5). That we can not only control collective cell behaviors, but also begin to optimize  
415 this control is exciting as there has been tremendous recent effort towards developing bioelectric wound  
416 dressings capable of improving healing *in vivo*<sup>53-56</sup>. We hope our results and control paradigms here might  
417 help enable next-generation biointerfaces for clinical applications, *a process that has been stalled despite*  
418 *promising results as the underlying mechanisms are difficult to characterize and observe, and there are*  
419 *few formal ‘design rules’ for thinking about how to improve performance*<sup>57</sup>  
420

421 More broadly, our findings highlight underlying fundamental principles across collective systems  
422 and are in line with diverse examples of collective motion and control. For example, swarm theory  
423 predicts that overly strong collective coupling can reduce the responsiveness of the system to external  
424 perturbations, a finding consistent with experimental data across multiple systems<sup>58</sup>. Panic in human  
425 groups can increase the strength and distance of correlated motion within the group, inhibiting the group’s  
426 ability to efficiently take advantage of exit cues and doorways during escape conditions<sup>59</sup>. Similarly,  
427 swarms of locust nymphs have been shown to be more difficult to redirect the denser and more aligned  
428 the natural structure of the swarm is<sup>60,61</sup>. Finally, penguin huddles exhibit a natural clustering tendency,  
429 creating a jamming transition that would cause penguins on the outside of the group to die of exposure  
430 unless penguin clusters break symmetry and push their neighbors to transiently fluidize this jammed state  
431 and allow circulation from the outside in<sup>62</sup>. In each of these examples, the underlying collective behaviors  
432 define the properties of the group, with stronger collectivity and coordination reducing the responsiveness  
433 and controllability of collectives. Given key similarities across collective systems, it is likely that there  
434 are many more guidelines from natural collective processes that we can take inspiration from to improve  
435 our ability to program tissues.

436

437 **References**

438

439 1. Friedl, P. & Gilmour, D. Collective cell migration in morphogenesis, regeneration and cancer. *Nat.*  
440 *Rev. Mol. cell Biol.* **10**, 445 (2009).

441 2. Li, J. & Lin, F. Microfluidic devices for studying chemotaxis and electrotaxis. *Trends Cell Biol.*  
442 **21**, 489–497 (2011).

443 3. Berthier, E. & Beebe, D. J. Gradient generation platforms: new directions for an established  
444 microfluidic technology. *Lab Chip* **14**, 3241–3247 (2014).

445 4. Weitzman, M. & Hahn, K. M. Optogenetic approaches to cell migration and beyond. *Curr. Opin.*  
446 *Cell Biol.* **30**, 112–120 (2014).

447 5. Xiong, S., Gao, H., Qin, L., Jia, Y.-G. & Ren, L. Engineering topography: Effects on corneal cell  
448 behavior and integration into corneal tissue engineering. *Bioact. Mater.* **4**, 293–302 (2019).

449 6. Zajdel, T. J., Shim, G., Wang, L., Rossello-Martinez, A. & Cohen, D. J. SCHEPDOG:  
450 Programming Electric Cues to Dynamically Herd Large-Scale Cell Migration. *Cell Syst.* **10**, 506-  
451 514.e3 (2020).

452 7. Gokoffski, K. K., Jia, X., Shvarts, D., Xia, G. & Zhao, M. Physiologic Electrical Fields Direct  
453 Retinal Ganglion Cell Axon Growth In Vitro. *Invest. Ophthalmol. Vis. Sci.* **60**, 3659–3668 (2019).

454 8. Li, L. *et al.* E-cadherin plays an essential role in collective directional migration of large epithelial  
455 sheets. *Cell. Mol. Life Sci.* **69**, 2779–2789 (2012).

456 9. Mayor, R. & Etienne-Manneville, S. The front and rear of collective cell migration. *Nature*  
457 *Reviews Molecular Cell Biology* (2016). doi:10.1038/nrm.2015.14

458 10. Petridou, N. I. & Heisenberg, C. Tissue rheology in embryonic organization. *EMBO J.* **38**, 1–13  
459 (2019).

460 11. Tlili, S. *et al.* Collective cell migration without proliferation: Density determines cell velocity and  
461 wave velocity. *R. Soc. Open Sci.* **5**, (2018).

462 12. Barriga, E. H., Franze, K., Charras, G. & Mayor, R. Tissue stiffening coordinates morphogenesis  
463 by triggering collective cell migration in vivo. *Nature* **554**, 523–527 (2018).

464 13. Kuriyama, S. *et al.* In vivo collective cell migration requires an LPAR2-dependent increase in  
465 tissue fluidity. *J. Cell Biol.* **206**, 113–127 (2014).

466 14. Vannier, C., Mock, K., Brabletz, T. & Driever, W. Zeb1 regulates E-cadherin and Epcam  
467 (epithelial cell adhesion molecule) expression to control cell behavior in early zebrafish  
468 development. *J. Biol. Chem.* **288**, 18643–18659 (2013).

469 15. McCaig, C. D., Song, B. & Rajnicek, A. M. Electrical dimensions in cell science. *J. Cell Sci.*  
470 (2009). doi:10.1242/jcs.023564

471 16. Cortese, B., Palama, I. E., D'Amone, S. & Gigli, G. Influence of electrotaxis on cell behaviour.  
472 *Integr. Biol.* **6**, 817–830 (2014).

473 17. Nuccitelli, R. A role for endogenous electric fields in wound healing. *Curr. Top. Dev. Biol.* **58**, 1–  
474 26 (2003).

475 18. Allen, G. M., Mogilner, A. & Theriot, J. A. Electrophoresis of cellular membrane components  
476 creates the directional cue guiding keratocyte galvanotaxis. *Curr. Biol.* **23**, 560–568 (2013).

477 19. Sprott, D., Aceh, kue tradisional khas & Sprott, D. PI3K inhibition reverses migratory direction of  
478 single cells but not cell groups in electric field. *Block Caving – A Viable Altern.* **21**, 1–9 (2020).

479 20. Lalli, M. L. & Asthagiri, A. R. Collective Migration Exhibits Greater Sensitivity But Slower  
480 Dynamics of Alignment to Applied Electric Fields. *Cell. Mol. Bioeng.* **8**, 247–257 (2015).

481 21. Cho, Y., Son, M., Jeong, H. & Shin, J. H. Electric field-induced migration and intercellular stress  
482 alignment in a collective epithelial monolayer. *Mol. Biol. Cell* **29**, 2292–2302 (2018).

483 22. Guo, X. *et al.* The galvanotactic migration of keratinocytes is enhanced by hypoxic  
484 preconditioning. *file:///C:/Users/gawoo/Downloads/Papers/nihms-415862.pdfScientific Reports* **5**,  
485 1–13 (2015).

486 23. Zhao, M. Electrical fields in wound healing-An overriding signal that directs cell migration.

- 487 *Semin. Cell Dev. Biol.* **20**, 674–682 (2009).
- 488 24. Elias, P. M., Ahn, S. K., Brown, B. E., Crumrine, D. & Feingold, K. R. Origin of the epidermal  
489 calcium gradient: Regulation by barrier status and role of active vs passive mechanisms. *J. Invest.*  
490 *Dermatol.* (2002). doi:10.1046/j.1523-1747.2002.19622.x
- 491 25. Menon, G. K., Grayson, S. & Elias, P. M. Ionic calcium reservoirs in mammalian epidermis:  
492 Ultrastructural localization by ion-capture cytochemistry. *J. Invest. Dermatol.* **84**, 508–512 (1985).
- 493 26. Menon, G. K., Elias, P. M., Lee, S. H. & Feingold, K. R. Localization of calcium in murine  
494 epidermis following disruption and repair of the permeability barrier. *Cell Tissue Res.* (1992).  
495 doi:10.1007/BF00645052
- 496 27. Yuspa, S. H., Kilkenny, A. E., Steinert, P. M. & Roop, D. R. Expression of murine epidermal  
497 differentiation markers is tightly regulated by restricted extracellular calcium concentrations in  
498 vitro. *J. Cell Biol.* **109**, 1207–1217 (1989).
- 499 28. Wang, F., Chen, S., Liu, H. B., Parent, C. A. & Coulombe, P. A. Keratin 6 regulates collective  
500 keratinocyte migration by altering cell–cell and cell–matrix adhesion. *J. Cell Biol.* **217**, 4314–4330  
501 (2018).
- 502 29. Vasioukhin, V. & Fuchs, E. Actin dynamics and cell-cell adhesion in epithelia. *Curr. Opin. Cell*  
503 *Biol.* **13**, 76–84 (2001).
- 504 30. Vedula, S. R. K. *et al.* Emerging modes of collective cell migration induced by geometrical  
505 constraints. *Proc. Natl. Acad. Sci. U. S. A.* **109**, 12974–12979 (2012).
- 506 31. Benjamin, J. M. *et al.*  $\alpha$ E-catenin regulates actin dynamics independently of cadherin-mediated  
507 cell-cell adhesion. *J. Cell Biol.* **189**, 339–352 (2010).
- 508 32. Xi, W., Sonam, S., Beng Saw, T., Ladoux, B. & Teck Lim, C. Emergent patterns of collective cell  
509 migration under tubular confinement. *Nat. Commun.* **8**, (2017).
- 510 33. Petitjean, L. *et al.* Velocity fields in a collectively migrating epithelium. *Biophys. J.* **98**, 1790–  
511 1800 (2010).
- 512 34. Cohen, D. J., Nelson, W. J. & Maharbiz, M. M. Galvanotactic control of collective cell migration  
513 in epithelial monolayers. *Nat. Mater.* **13**, 409–417 (2014).
- 514 35. Vaezi. Actin Cable Dynamics and Rho/Rock Orchestrate a Polarized Cytoskeletal Architecture in  
515 the Early Steps of Assembling a Stratified Epithelium. *J. Appl. Econ. Sci.* **4**, 169–184 (2009).
- 516 36. Vasioukhin, V., Bauer, C., Yin, M. & Fuchs, E. Directed Actin Polymerization Is the Driving  
517 Force for Epithelial Cell-Cell Adhesion-catenin associates with several other actin-binding. *AJs*  
518 (*Drubin Nelson* **100**, 209–219 (2000).
- 519 37. Cavagna, A. *et al.* Scale-free correlations in starling flocks. *Proc. Natl. Acad. Sci. U. S. A.* **107**,  
520 11865–11870 (2010).
- 521 38. Spatarelu, C.-P. *et al.* Biomechanics of Collective Cell Migration in Cancer Progression:  
522 Experimental and Computational Methods. *ACS Biomater. Sci. Eng.* **5**, 3766–3787 (2019).
- 523 39. Bashirzadeh, Y., Poole, J., Qian, S. & Maruthamuthu, V. Effect of pharmacological modulation of  
524 actin and myosin on collective cell electrotaxis. *Bioelectromagnetics* **39**, 289–298 (2018).
- 525 40. Zhao, M., Agius-Fernandez, A., Forrester, J. V. & McCaig, C. D. Directed migration of corneal  
526 epithelial sheets in physiological electric fields. *Investig. Ophthalmol. Vis. Sci.* **37**, 2548–2558  
527 (1996).
- 528 41. Pérez-González, C. *et al.* Active wetting of epithelial tissues. *Nat. Phys.* **15**, 79–88 (2019).
- 529 42. Douezana, S. & Brochard-Wyart, F. Dewetting of cellular monolayers. *Eur. Phys. J. E* **35**, 0–5  
530 (2012).
- 531 43. Saltukoglu, D. *et al.* Spontaneous and electric field-controlled front-rear polarization of human  
532 keratinocytes. *Mol. Biol. Cell* **26**, 4373–4386 (2015).
- 533 44. Mycielska, M. E. & Djamgoz, M. B. A. Cellular mechanisms of direct-current electric field  
534 effects: Galvanotaxis and metastatic disease. *J. Cell Sci.* **117**, 1631–1639 (2004).
- 535 45. Shanley, L. J., Walczysko, P., Bain, M., MacEwan, D. J. & Zhao, M. Influx of extracellular Ca<sup>2+</sup>  
536 is necessary for electrotaxis in Dictyostelium. *J. Cell Sci.* **119**, 4741–4748 (2006).
- 537 46. Bikle, D. D., Ratnam, A., Mauro, T., Harris, J. & Pillai, S. Changes in calcium responsiveness and

- 538 handling during keratinocyte differentiation: Potential role of the calcium receptor. *J. Clin. Invest.*  
539 **97**, 1085–1093 (1996).
- 540 47. Perez, T. D. & Nelson, W. J. Cadherin Adhesion: Mechanisms and Molecular Interactions. **5**, 3–21  
541 (2004).
- 542 48. Kim, S. A., Tai, C. Y., Mok, L. P., Mosser, E. A. & Schuman, E. M. Calcium-dependent dynamics  
543 of cadherin interactions at cell-cell junctions. *Proc. Natl. Acad. Sci. U. S. A.* **108**, 9857–9862  
544 (2011).
- 545 49. Zajdel, T. J., Shim, G. & Cohen, D. J. Come together: bioelectric healing-on-a-chip. *bioRxiv*  
546 (2020). doi:10.1101/2020.12.29.424578
- 547 50. Shellard, A. & Mayor, R. Supracellular migration - Beyond collective cell migration. *Journal of*  
548 *Cell Science* (2019). doi:10.1242/jcs.226142
- 549 51. De Pascalis, C. & Etienne-Manneville, S. Single and collective cell migration: The mechanics of  
550 adhesions. *Mol. Biol. Cell* **28**, 1833–1846 (2017).
- 551 52. Lalli, M. L., Wojeski, B. & Asthagiri, A. R. Label-Free Automated Cell Tracking: Analysis of the  
552 Role of E-cadherin Expression in Collective Electrotaxis. *Cell. Mol. Bioeng.* **10**, 89–101 (2017).
- 553 53. Long, Y. *et al.* Effective Wound Healing Enabled by Discrete Alternative Electric Fields from  
554 Wearable Nanogenerators. *ACS Nano* **12**, 12533–12540 (2018).
- 555 54. Boateng, J. & Catanzano, O. Advanced Therapeutic Dressings for Effective Wound Healing - A  
556 Review. *J. Pharm. Sci.* **104**, 3653–3680 (2015).
- 557 55. Li, M. *et al.* Toward Controlled Electrical Stimulation for Wound Healing Based on a Precision  
558 Layered Skin Model. *ACS Appl. Bio Mater.* **3**, 8901–8910 (2020).
- 559 56. Zhao, Z. *et al.* Optimization of Electrical Stimulation for Safe and Effective Guidance of Human  
560 Cells. *Bioelectricity* **2**, 372–381 (2020).
- 561 57. Zhao, M., Penninger, J. & Isseroff, R. R. Electrical Activation of Wound-Healing Pathways. *Adv.*  
562 *Skin Wound Care* **1**, 567–573 (2010).
- 563 58. Bouffanais, R. A Computational Approach to Collective Behaviors. in *Design and Control of*  
564 *Swarm Dynamics* 95–104 (Springer Singapore, 2016). doi:10.1007/978-981-287-751-2\_6
- 565 59. Jiang, L., Li, J., Shen, C., Yang, S. & Han, Z. Obstacle optimization for panic flow - Reducing the  
566 tangential momentum increases the escape speed. *PLoS One* **9**, 21–25 (2014).
- 567 60. Buhl, J. *et al.* From Disorder to Order in Marching Locusts. *Science (80-. )*. **312**, 1402–1406  
568 (2006).
- 569 61. Yates, C. A. *et al.* Inherent noise can facilitate coherence in collective swarm motion. *Proc. Natl.*  
570 *Acad. Sci. U. S. A.* **106**, 5464–5469 (2009).
- 571 62. Zitterbart, D. P., Wienecke, B., Butler, J. P. & Fabry, B. Coordinated movements prevent jamming  
572 in an emperor penguin huddle. *PLoS One* **6**, 5–7 (2011).
- 573

**A** Effect of calcium on shape and E-cadherin junctions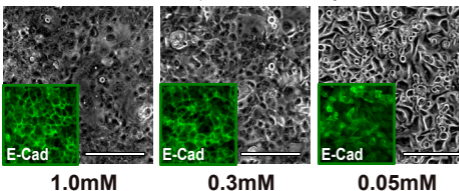**B** Junctional E-cadherin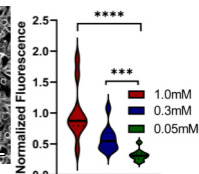**C** Effect of calcium on endogenous directionality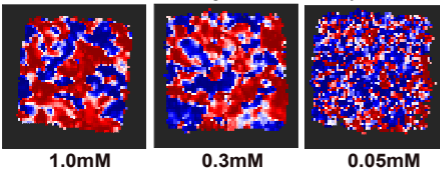**D** Coordination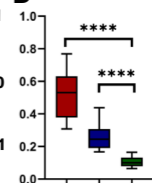**E** Baseline speed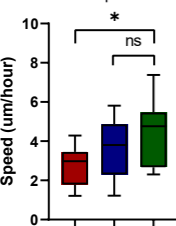**F** Monolayer migration with stimulation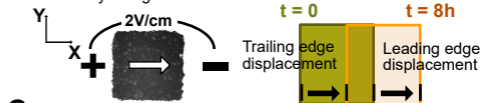**G** Monolayer migration with stimulation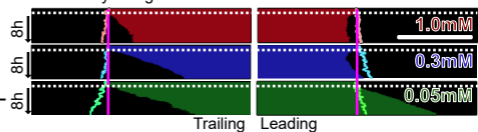



### A X-velocity heatmap kymographs with stimulation

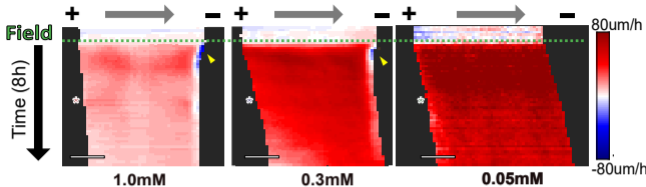

### B Maximum speed

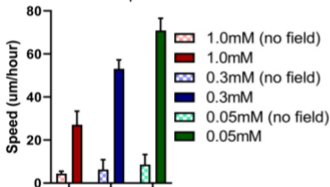

### C X-velocity dynamics with stimulation

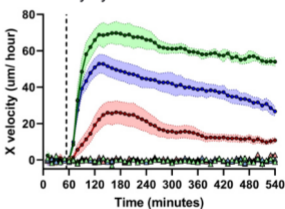

### D Directionality at 4h

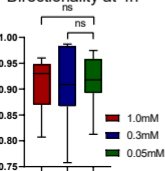

### E Directionality dynamics with stimulation

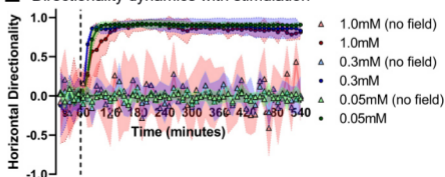

**A** Leading edge retraction and cell death with electrical stimulation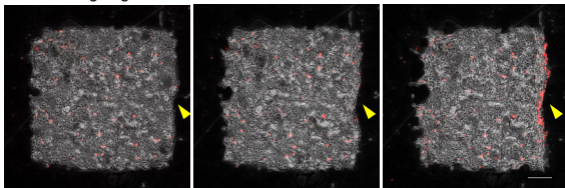**t = 0****t = 1h****t = 2h****B** Leading edge retraction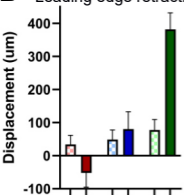

1.0mM (no field)

1.0mM

0.3mM (no field)

0.3mM

0.05mM (no field)

0.05mM

**C** Retraction

Lamellipodial retraction

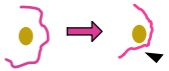

Cell body retraction

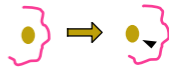**D** Onset of retraction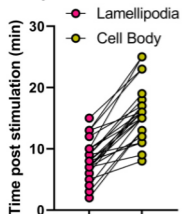**E** Leading edge retraction dynamic with inhibitors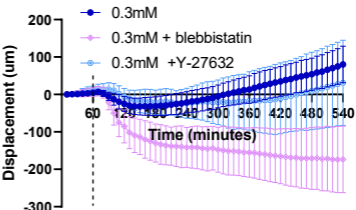

**A** E-cad + DECMA **B** Baseline speed with DECMA **C** Coordination with DECMA

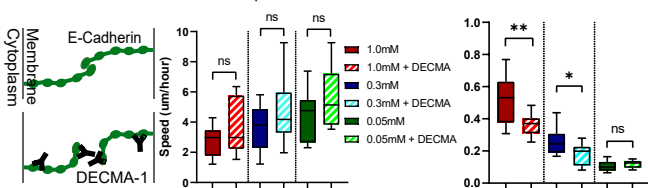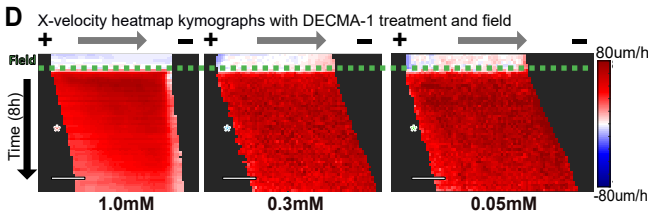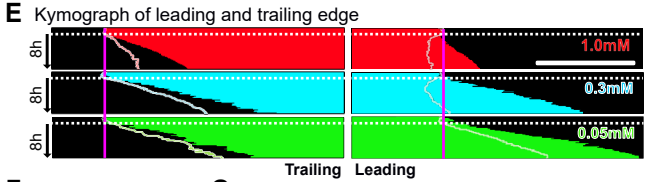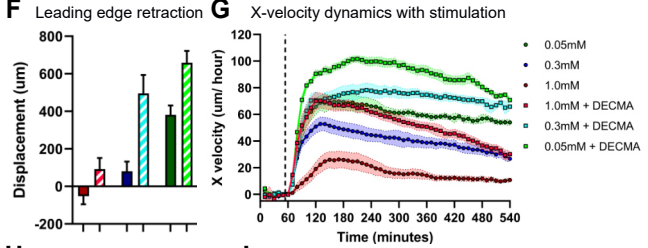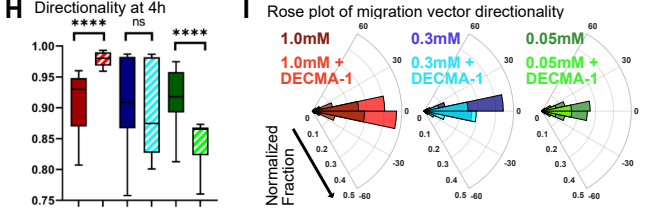

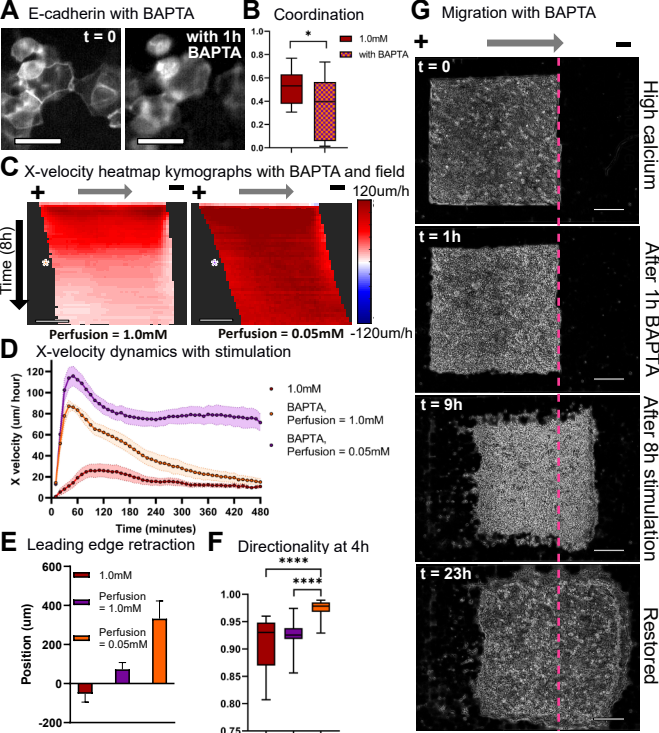

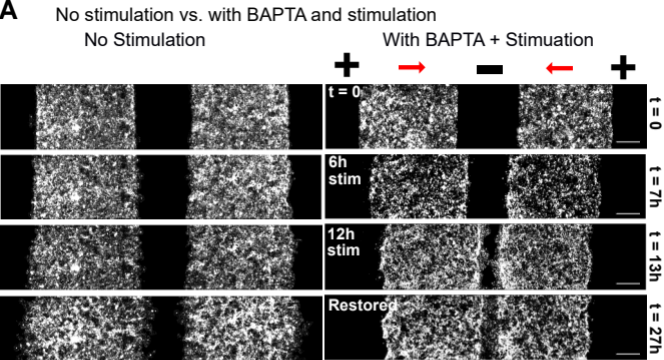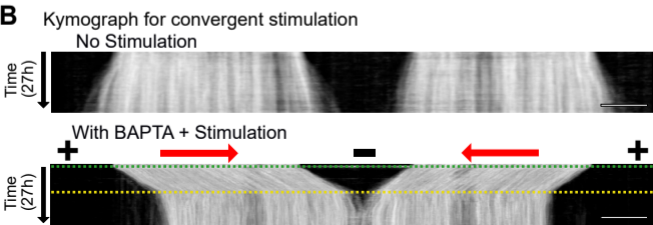

Source: http://biorxiv.org/content/10.1101/2021.01.23.427700v1.full.pdf
